# Supplementary material for: IL-17A and PA synergistically promote the progression of melanoma by accelerating pATF2-CPT1A-mediated β-oxidation
Source: Research Square preprint supplement (doi:10.21203/rs.3.rs-3201729/v1), 2023-08-01
Supplement: Supplementary file 1 [file 6f7d6b38c00a75f09c5e49c5.docx]

Supplementary table 1 the Protein chip calculation results

| Detectability Factor | rise | Detectability Factor | rise | Detectability Factor | decline |
| --- | --- | --- | --- | --- | --- |
| BLC  CD30  Fas Ligand  Fractalkine  GCSF  GM-CSF  IFN-Y  IL-la  IL-1B  IL-2  IL-3  IL-9  IL-10  IL-12  P40/P70 | 0.1723  0.0961  1.5971  0.4874  0.7099  0.1890  1.0880  0.2778  0.3598  0.0626  0.5123  0.1573  0.9807  0.9800  0.4458 | IL-13  IL-12 P70  IL-17A  I-TAC  Leptin  M-CSF  MIP-lα  RANTES  SDF-I α  I-309  TECK | 0.3033  0.4458  1.3022  2.6723  0.0724  0.0077  0.3055  0.3141  0.3699  0.0861  0.3078 | Eotaxin-1  Eotaxin-2  IL-4  1L-6  KC  LIX  XCL1  MCP-1  MIG  MIP-1γ  TIMP-1  TIMP-2  TNF-α  TNERI  TNFRⅡ | 0.3510  0.5491  0.1385  0.1567  0.1266  0.2180  0.3115  0.2013  0.0909  0.4012  0.1245  0.4619  0.7600  0.3426  0.3999 |
